# Supplementary material for: Nickel -supported PdM (M = Au and Ag) nanodendrites as formate oxidation (electro)catalytic anodes for direct fuel cells and hydrogen generation at room temperature
Source: Royal Society of Chemistry journal article supplement (doi:10.1039/d2nr06637h), 2023-01-01
Supplement: d2nr06637h1.pdf [file d2nr06637h1.pdf]

**Nickel-supported PdM (M=Au, Ag) nanodendrites as formate oxidation  
(electro)catalytic anodes for direct fuel cell and hydrogen generation in room  
temperature**

Bowei Pan<sup>a,b</sup>, Shuang Shan<sup>a,b</sup>, Junpeng Wang<sup>a,b</sup>, Quan Tang<sup>a,b</sup>, Longfei Guo<sup>a,b</sup>, Tao Jin<sup>a,b</sup>, Qiao Wang<sup>a,b</sup>, Zhen Li<sup>a,b</sup>, Muhammad Usman<sup>a,b</sup> and Fuyi Chen<sup>a,b,\*</sup>

<sup>a</sup> State Key Laboratory of Solidification Processing, Northwestern Polytechnical University, Xi'an, 710072, China

<sup>b</sup> School of Materials Science and Engineering, Northwestern Polytechnical University, Xi'an, 710072, China

\*Corresponding author: E-mail: [fuyichen@nwpu.edu.cn](mailto:fuyichen@nwpu.edu.cn)

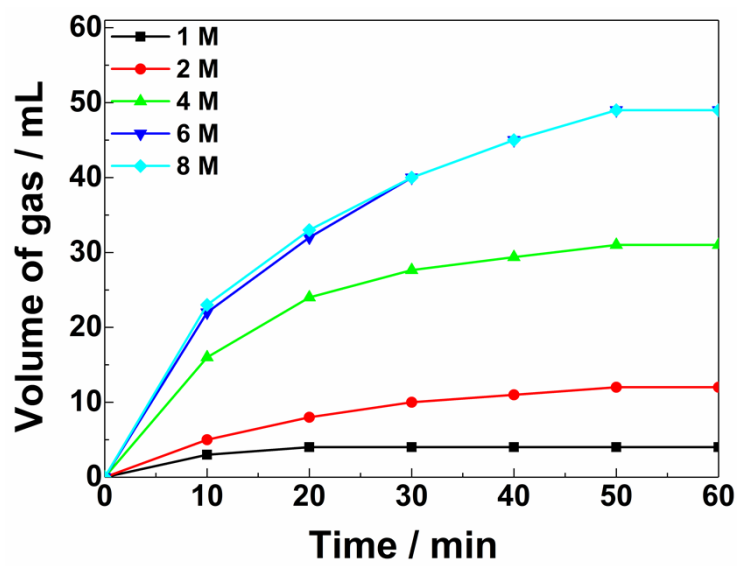

**Figure S1.** Variation volume of hydrogen gas for catalyzed decomposition of formate over PdAu/NiNF catalyst under different potassium formate concentration

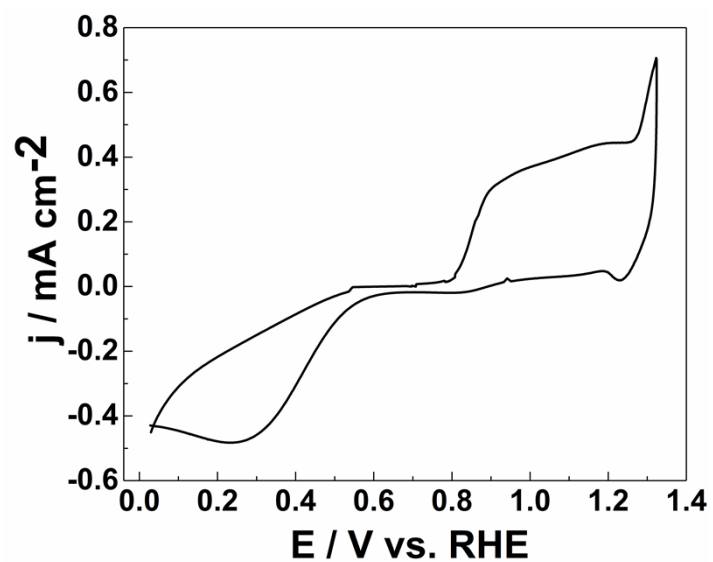

**Figure S2.** CV curve of Ni Foam recorded in  $\text{N}_2$ -saturated 1 M KOH and 1 M HCOOK with a sweep rate of  $50 \text{ mV s}^{-1}$ .

Table S1. A literature survey of the activity of Pd-based FOR catalysts in alkaline media

| Catalyst                                        | Electrolyte           | Scan rate<br>(mV·s <sup>-1</sup> ) | Specific Activity<br>(mA·cm <sup>-2</sup> ) | Reference |
|-------------------------------------------------|-----------------------|------------------------------------|---------------------------------------------|-----------|
| PdAu/NiNF                                       | 1 M KOH + 1 M HCOOK   | 50                                 | 10.37                                       | This work |
| PdAg/NiNF                                       | 1 M KOH + 1 M HCOOK   | 50                                 | 7.11                                        | This work |
| Pd <sub>6</sub> Ag <sub>3</sub> Rh <sub>1</sub> | 1 M KOH + 1 M HCOOK   | 50                                 | 4.21                                        | [1]       |
| Pd/CeO <sub>2</sub>                             | 1 M KOH + 1 M HCOOK   | 20                                 | 9.54                                        | [2]       |
| PdMn                                            | 1 M KOH + 0.5 M HCOOK | 50                                 | 1.55                                        | [3]       |
| PdB/C                                           | 1 M KOH + 0.5 M HCOOK | 50                                 | 7.41                                        | [4]       |
| PdH-ND                                          | 1 M KOH + 0.5 M HCOOK | 50                                 | 5.18                                        | [5]       |
| PdAgCu                                          | 1 M KOH + 1 M HCOOK   | 50                                 | 10.1                                        | [6]       |
| PdRh/C                                          | 1 M KOH + 1 M HCOOK   | 50                                 | 8.1                                         | [7]       |
| L-Pd aerogel                                    | 1 M KOH + 1 M HCOOK   | 50                                 | 3.97                                        | [8]       |
| Pd/C-H                                          | 1 M NaOH + 1 M HCOONa | 50                                 | 7.4                                         | [9]       |

## References

1. T. T. Gebremariam, F. Chen, B. Kou, L. Guo, B. Pan, Q. Wang, Z. Li and W. Bian, *Electrochimica Acta*, 2020, **354**, 136678.
2. Y. Zhao, K. Zhang, Y. Li, C. Li, R. Zhao, Y. Ji, Y. Meng, T. Hu, H. Wang, Z. Yang and Y.-M. Yan, *ACS Applied Materials & Interfaces*, 2021, **13**, 51643-51651.
3. H. Wang, H. Chen, Q. Mao, K. Deng, H. Yu, X. Wang, Y. Xu, Z. Wang and L. Wang, *Chemical Communications*, 2022, **58**, 13115-13118.
4. S. Hong, S. Chung, J. Park, J. P. Hwang, C. H. Lee, S. Uhm, S. Bong and J. Lee, *ACS Catalysis*, 2021, **11**, 4722-4729.
5. H.-Y. Sun, Y. Ding, Y.-Q. Yue, Q. Xue, F.-M. Li, J.-X. Jiang, P. Chen and Y. Chen, *ACS Applied Materials & Interfaces*, 2021, **13**, 13149-13157.
6. Q. Wang, F. Chen, L. Guo, T. Jin, H. Liu, X. Wang, X. Gong and Y. Liu, *Journal of Materials Chemistry A*, 2019, **7**, 16122-16135.
7. J. Bai, Q. Xue, Y. Zhao, J. Jiang, J. Zeng, S. Yin and Y. Chen, *ACS Sustainable Chemistry & Engineering*, 2019, **7**, 2830-2836.
8. R. Zhang, L. Zhu, X. Liu, J. Zhu and Y. Zhao, *ACS Sustainable Chemistry & Engineering*, 2021, **9**, 7837-7845.
9. X. Sun, Y. Lou, Y.-L. He and Y. Li, *Journal of Power Sources*, 2021, **499**, 229960.
